# Supplementary material for: Clinical, radiological and pathological findings in patients with persistent lung disease following SARS-CoV-2 infection
Source: PubMed Central journal article supplement — Eur Respir J. 2022 Oct 6;60(4):2102411. doi: 10.1183/13993003.02411-2021 (PMC8932282; doi:10.1183/13993003.02411-2021), 2022-10-06

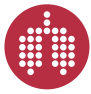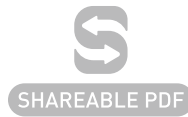

# Clinical, radiological and pathological findings in patients with persistent lung disease following SARS-CoV-2 infection

Claudia Ravaglia<sup>1</sup>, Claudio Doglioni<sup>2</sup>, Marco Chilosi<sup>3</sup>, Sara Piciucchi <sup>4</sup>, Alessandra Dubini<sup>5</sup>, Giulio Rossi<sup>6</sup>, Federica Pedica <sup>7</sup>, Silvia Puglisi<sup>1</sup>, Luca Donati<sup>8</sup>, Sara Tomassetti <sup>9</sup> and Venerino Poletti<sup>1,10,11</sup>

<sup>1</sup>Dept of Thoracic Diseases, G.B. Morgagni Hospital/University of Bologna, Forlì, Italy. <sup>2</sup>Dept of Pathology, University Vita-Salute, Milan and San Raffaele Scientific Institute, Milan, Italy. <sup>3</sup>Dept of Pathology, Pederzoli Hospital, Peschiera del Garda, Italy. <sup>4</sup>Dept of Radiology, G.B. Morgagni Hospital/University of Bologna, Forlì, Italy. <sup>5</sup>Dept of Pathology, G.B. Morgagni Hospital/University of Bologna, Forlì, Italy. <sup>6</sup>Dept of Pathology, Fondazione Poliambulanza Istituto Ospedaliero Multispecialistico, Brescia, Italy. <sup>7</sup>Dept of Pathology, San Raffaele Scientific Institute, Milan, Italy. <sup>8</sup>Biostatistics and Clinical Trial Unit, Istituto Romagnolo per lo Studio dei Tumori “Dino Amadori”-IRST S.r.l., IRCCS, Meldola, Italy. <sup>9</sup>Dept of Experimental and Clinical Medicine, Careggi University Hospital, Firenze, Italy. <sup>10</sup>DIMES, University of Bologna, Bologna, Italy. <sup>11</sup>Dept of Respiratory Diseases and Allergy, Aarhus University Hospital, Aarhus, Denmark.

Corresponding author: Claudia Ravaglia ([claudiaravaglia79@gmail.com](mailto:claudiaravaglia79@gmail.com))

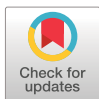

Shareable abstract (@ERSpublications)

**Post-COVID lung disease is not a single entity, but includes different subtypes, each of them potentially requiring separate and different management** <https://bit.ly/3BJDeUF>

**Cite this article as:** Ravaglia C, Doglioni C, Chilosi M, *et al.* Clinical, radiological and pathological findings in patients with persistent lung disease following SARS-CoV-2 infection. *Eur Respir J* 2022; 60: 2102411 [DOI: 10.1183/13993003.02411-2021].

This single-page version can be shared freely online.

Copyright ©The authors 2022.

This version is distributed under the terms of the Creative Commons Attribution Non-Commercial Licence 4.0. For commercial reproduction rights and permissions contact [permissions@ersnet.org](mailto:permissions@ersnet.org)

Received: 4 Sept 2021  
Accepted: 13 Feb 2022

## Abstract

Some patients experience pulmonary sequelae after SARS-CoV-2 infection, ranging from self-limited abnormalities to major lung diseases. Morphological analysis of lung tissue may help our understanding of pathogenic mechanisms and help to provide consistent personalised management. The aim of this study was to ascertain morphological and immunomolecular features of lung tissue. Transbronchial lung cryobiopsy was carried out in patients with persistent symptoms and computed tomography suggestive of residual lung disease after recovery from SARS-CoV-2 infection. 164 patients were referred for suspected pulmonary sequelae after COVID-19; 10 patients with >5% parenchymal lung disease underwent lung biopsy. The histological pattern of lung disease was not homogeneous and three different case clusters could be identified, which was mirrored by their clinical and radiological features. Cluster 1 (“chronic fibrosing”) was characterised by post-infection progression of pre-existing interstitial pneumonias. Cluster 2 (“acute/subacute injury”) was characterised by different types and grades of lung injury, ranging from organising pneumonia and fibrosing nonspecific interstitial pneumonia to diffuse alveolar damage. Cluster 3 (“vascular changes”) was characterised by diffuse vascular increase, dilatation and distortion (capillaries and venules) within otherwise normal parenchyma. Clusters 2 and 3 had immunophenotypical changes similar to those observed in early/mild COVID-19 pneumonias (abnormal expression of STAT3 in hyperplastic pneumocytes and PD-L1, IDO and STAT3 in endothelial cells). This is the first study correlating histological/immunohistochemical patterns with clinical and radiological pictures of patients with post-COVID lung disease. Different phenotypes with potentially different underlying pathogenic mechanisms have been identified.

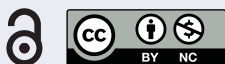

Supplement: ERJ-02411-2021.Shareable.pdf [file ERJ-02411-2021.Shareable.pdf]
