# Supplementary material for: Clinical, radiological and pathological findings in patients with persistent lung disease following SARS-CoV-2 infection
Source: PubMed Central journal article supplement — Eur Respir J. 2022 Oct 6;60(4):2102411. doi: 10.1183/13993003.02411-2021 (PMC8932282; doi:10.1183/13993003.02411-2021), 2022-10-06
Supplement: ERJ-02411-2021.SUPPLEMENT.pdf [file ERJ-02411-2021.SUPPLEMENT.pdf]

## **Materials and methods**

### *Patients selection*

Patients were offered a comprehensive medical assessment with detailed history and physical examination: data on all clinical characteristics were collected and information about specific symptoms potentially correlated with COVID-19 were obtained. Before medical visit, all patients underwent lung function respiratory tests (forced vital capacity - FVC, diffusion capacity of the lung for carbon monoxide - DLCO, six-minute walking test - 6MWT) and chest high resolution computed tomography (HRCT). Key exclusion criteria were severely compromised lung function (FVC  $\leq$  50% or DLCO  $\leq$  40% of predicted value) or resting hypoxaemia (SpO<sub>2</sub> <90% on room air), high bleeding risk (abnormal coagulation parameters or platelets <100x10<sup>9</sup>/L or anti-platelet agents), pulmonary hypertension (estimated right ventricular systolic pressure > 50 mmHg on echocardiogram and/or right ventricular dysfunction), severe comorbidities (including ischaemic heart disease, severe obesity, uncontrolled severe hypertension or heart failure, severe heart valves disease, myocarditis, acute pulmonary embolus/thrombus/venous thromboembolic disorders, mental impairment, current infective illness)

### *Computed tomography images*

Chest computed tomography had to be no more than two weeks older than the date of the bronchoscopy. Scans were viewed in the lung window settings (width 1000-1500 Hounsfield Units, HU; level 700 to -550 HU). Prevalent features were listed, including peri-lobular changes, ground glass opacities, consolidations, traction bronchiectasis, reticulation, honey-combing, nodules, crazy paving; distinct patterns were described when possible (fibrotic or non-fibrotic), such as UIP pattern (usual interstitial pneumonia), NSIP (non-specific interstitial pneumonia), HP (hypersensitivity pneumonitis), indeterminate for UIP pattern, OP-like (organizing pneumonia), etc.

### *Bronchoscopic procedure*

Lung samples were obtained by trans-bronchial lung cryobiopsy. Cryobiopsy was performed with rigid technique: patients were intubated with rigid bronchoscope and tissue biopsy was carried out by using the flexible bronchoscope inserted through the rigid tube. 1,7 or 1,9 mm probes were used. The cryobiopsy site was decided taking into consideration the HRCT scan appearance of each case and the biopsies were targeted at specific areas of the scan in accordance with the dedicated radiologist. Fluoroscopy guidance was always used.

Prophylactic endobronchial Fogarty balloon was always placed in the lobar bronchus near the biopsy segment and inflated after each biopsy, then immediately deflated in case of no hemorrhage. Patients were deeply sedated (propofol and remifentanyl) and spontaneous breathing was maintained during the procedure. During the bronoscopic procedure, bronchoalveolar lavage (BAL) was also performed in all patients. Blood examinations included blood count, coagulation profile, serum biochemical tests (including renal and liver function, lactate dehydrogenase, and electrolytes), interleukin-6 (IL-6), serum ferritin, and D-dimer.

#### *Histological patterns and immunohistochemistry*

All specimens were fixed in 10% buffered formalin and routinely paraffin-embedded. Morphologic examination was based on conventional hematoxylin-eosin stains and immunostaining with cytokeratin 7. The modifications were defined according to histological patterns. Immunohistochemical markers were applied, in order to better recognize and characterize different cell types and phenotypes within the pulmonary microenvironment. All immunohistochemical tests were performed in the ULTRA Benchmark 141 automated immunostainer (Ventana Medical Systems/Roche, Tucson, AZ) using standard procedures and reagents are described in Table S1

#### **Results**

None of the patients were immunocompromised before contracting COVID-19; none had received corticosteroids since hospital discharge or acute phase recovery.

Cluster two patients were treated with steroids following lung biopsy results. Prednisone was started at initial dose of 0.5 mg/kg per day given as a single oral dose in the morning for four weeks; if patient was stable or improved, prednisone was gradually tapered for the ensuing four to six weeks and after three to six months, the dose was gradually tapered to zero. Patients with organizing pneumonia on lung biopsy experienced significant improvement in both symptoms and lung function impairment; DLCO improved from 50%, 43% and 44% of predicted value to 69%, 72% and 62% respectively after three months; three-months follow-up CT scan showed a significant reduction in ground glass areas and peribular pattern in all cases. Patients with diffuse alveolar damage / proliferative phase features on lung biopsy showed moderate improvement, both clinical and functional, with complete resolution of fever and reduction of shortness of breath, although persistent on mild to moderate exertion; the three-months follow-up CT scan showed a slight reduction of the extension of parenchymal involvement. There is still insufficient data about treatment of patients with clinical, radiological and morphological picture compatible with post-COVID-19 organizing pneumonia.



|                                          |                                                              |                                                       |                           |                                      |                                |                  |                                 |                                      |                                                    |                                                    |
|------------------------------------------|--------------------------------------------------------------|-------------------------------------------------------|---------------------------|--------------------------------------|--------------------------------|------------------|---------------------------------|--------------------------------------|----------------------------------------------------|----------------------------------------------------|
| <b>Prior PFTs</b>                        | no                                                           | normal                                                | no                        | no                                   | no                             | no               | no                              | no                                   | no                                                 | no                                                 |
| <b>Hospital or Home (acute phase)</b>    | Hospital                                                     | Hospital                                              | Hospital                  | Hospital                             | Hospital                       | Home             | Hospital                        | Hospital                             | Home                                               | Home                                               |
| <b>Respiratory Support (acute phase)</b> | Oxygen                                                       | Oxygen                                                | Oxygen                    | Oxygen NIV                           | Oxygen                         | No               | Oxygen                          | Oxygen NIV                           | No                                                 | No                                                 |
| <b>Treatment (acute phase)</b>           | Antivirals<br>Steroids<br>LMWH<br>Canakinumab<br>Antibiotics | Steroids<br>LMWH<br>Hydroxychloroquine<br>Antibiotics | Steroids<br>LMWH          | Steroids<br>LMWH                     | Antivirals<br>Steroids<br>LMWH | Antibiotics      | Steroids<br>LMWH<br>Antibiotics | Steroids<br>LMWH                     | LMWH<br>Azithromycine                              | Steroids<br>Azithromycine                          |
| <b>Persistent symptoms</b>               | Cough<br>Dyspnea                                             | Cough<br>Dyspnea                                      | Cough<br>Fatigue<br>Fever | Cough<br>Dyspnea<br>Fatigue<br>Fever | Cough<br>Dyspnea               | Dyspnea<br>Fever | Dyspnea<br>Fever                | Cough<br>Dyspnea<br>Fatigue<br>Aches | Cough<br>Dyspnea<br>Fatigue<br>Aches<br>Depression | Dyspnea<br>Fatigue<br>Aches<br>Fever<br>Depression |
| <b>Time (days) *</b>                     | 100                                                          | 227                                                   | 32                        | 65                                   | 76                             | 160              | 56                              | 123                                  | 137                                                | 44                                                 |
| <b>FVC (%)</b>                           | 87                                                           | 96                                                    | 78                        | 46                                   | 64                             | 74               | 96                              | 77                                   | 116                                                | 72                                                 |
| <b>DLCO (%)</b>                          | 44                                                           | 61                                                    | 50                        | 43                                   | 43                             | 44               | 51                              | 72                                   | 80                                                 | 73                                                 |

Definition of abbreviations: M = male; F = female; LMWH = low molecular weight heparin; NIV = non invasive ventilation; FVC = forced vital capacity; DLCO = carbon-monoxide diffusion coefficient; PFTs = pulmonary function tests; fILA = fibrotic interstitial lung abnormalities. \*Time means interval in days between recovery (defined in the text) and bronchoscopy

**Table S3.** Laboratory findings and broncho-alveolar lavage data (BAL) of patients at the time of biopsy

|                                               | Pat.1 | Pat.2 | Pat.3         | Pat.4      | Pat.5 | Pat.6 | Pat.7             | Pat.8 | Pat.9         | Pat.10        |
|-----------------------------------------------|-------|-------|---------------|------------|-------|-------|-------------------|-------|---------------|---------------|
| <b>Blood lymphocytes (Nx10<sup>9</sup>/L)</b> | 1,63  | 3,08  | 3,05          | 4,61       | 1,71  | 2,83  | 1,93              | 1,54  | 1,15          | 4,02          |
| <b>Blood D-dimer (ug/L)</b>                   | 620   | 532   | 1130          | 487        | 421   | 357   | 886               | 198   | 160           | 174           |
| <b>Ferritin (ug/L)</b>                        | 257   | 148   | 541           | 101        | 234   | 283   | 492               | 615   | 376           | 12            |
| <b>Blood LDH (U/L)</b>                        | 312   | 238   | 241           | 291        | 379   | 180   | 285               | 250   | 182           | 148           |
| <b>Auto-antibodies</b>                        |       |       |               | anti-Ro 60 |       |       | ANA 1/89 speckled |       |               | Mi-2beta      |
| <b>CRP (mg/L)</b>                             | 1     | 3     | 15,1          | 1,8        | 0,9   | 53    | 14,2              | 1     | 0,8           | 0,3           |
| <b>BAL total cells (10<sup>6</sup>/L)</b>     | 398   | 102   | 3             | 179        | 364   | 717   | 128               | 159   | 177           | 103           |
| <b>BAL lymphocytes (%)</b>                    | 15    | 7     | Not evaluable | 25         | 25    | 72    | 15                | 11    | 5             | 2             |
| <b>BAL neutrophils (%)</b>                    | 3     | 9     | Not evaluable | 3          | 6     | 3     | 7                 | 19    | 3             | 2             |
| <b>BAL macrophages (%)</b>                    | 82    | 83    | Not evaluable | 71         | 69    | 25    | 75                | 70    | 92            | 96            |
| <b>BAL eosinophils (%)</b>                    | 0     | 1     | Not evaluable | 1          | 0     | 0     | 3                 | 0     | 0             | 0             |
| <b>CD4+/CD8+ lymphocytes ratio</b>            | 0,8   | 0,8   | Not evaluable | 2,5        | 1,4   | 0,6   | 0,2               | 0,6   | Not evaluable | Not evaluable |

**Table S4. Histological patterns and immunohistochemistry**

| Cluster 1 (pre-existing chronic fibrosing)                                                                                  | Cluster 2 (acute/sub-acute injury)                                                                                    | Cluster 3 (minimal changes - vascular abnormalities)                                              |
|-----------------------------------------------------------------------------------------------------------------------------|-----------------------------------------------------------------------------------------------------------------------|---------------------------------------------------------------------------------------------------|
| Histological patterns                                                                                                       |                                                                                                                       |                                                                                                   |
| -fibroblastic foci<br>-microscopic honeycombing<br>-interstitial collagenous fibrosis<br>-nodular aggregates of lymphocytes | -OP<br>-alveolar cell hyperplasia<br>-DAD (organization phase)<br>-perivascular and interstitial lymphoid infiltrates | -diffuse dilatation of vascular lumina (both interstitial capillaries and post-capillary venules) |
| Immunohistochemistry                                                                                                        |                                                                                                                       |                                                                                                   |

|                                                                                                                                   |                                                                                                                                                                                                                                                                                                                                                  |                                                                                                                                                                                                                                                                     |
|-----------------------------------------------------------------------------------------------------------------------------------|--------------------------------------------------------------------------------------------------------------------------------------------------------------------------------------------------------------------------------------------------------------------------------------------------------------------------------------------------|---------------------------------------------------------------------------------------------------------------------------------------------------------------------------------------------------------------------------------------------------------------------|
| <p><i>Alveolar cells</i></p> <p>-focal p16<br/>-no PD-L1</p> <p><i>Endothelial cells</i></p> <p>-limited IDO<br/>-focal PD-L1</p> | <p><i>Alveolar cells</i></p> <p>-nuclear pSTAT3<br/>-Ki67<br/>-rare PD-L1</p> <p><i>Endothelial cells</i></p> <p>-diffuse IDO (*)<br/>-diffuse PD-L1 (*)<br/>-diffuse nuclear pSTAT3 (*)<br/>(*) both interstitial capillary vessels and venules.</p> <p><i>Stromal/interstitial compartment</i></p> <p>-TUBB3 (areas of stromal remodeling)</p> | <p><i>Alveolar cells</i></p> <p>-no PD-L1<br/>-no TUBB3</p> <p><i>Endothelial cells</i></p> <p>-diffuse PD-L1 (*)<br/>-diffuse IDO (*)<br/>(*) both interstitial capillary vessels and venules.</p> <p><i>Stromal/interstitial compartment</i></p> <p>-no TUBB3</p> |
|-----------------------------------------------------------------------------------------------------------------------------------|--------------------------------------------------------------------------------------------------------------------------------------------------------------------------------------------------------------------------------------------------------------------------------------------------------------------------------------------------|---------------------------------------------------------------------------------------------------------------------------------------------------------------------------------------------------------------------------------------------------------------------|

Abbreviations: FF = fibroblastic foci; HC = honeycombing; OP = organizing pneumonia; DAD = diffuse alveolar damage; TUBB = Tubulin-beta; IDO = indoleamine 2,3-dioxygenase-1

**Table S5. Clinical and radiological features of patients with parenchymal lung disease on CT scan with extension > 5% but not undergoing lung biopsy (contraindications or not consenting)**

|                  | HRCT SCAN                                                                                              | GENDER (M/F) | AGE (years) | SYMPTOMS                                                                                                                                 | TIME FROM RECOVERY (days) |
|------------------|--------------------------------------------------------------------------------------------------------|--------------|-------------|------------------------------------------------------------------------------------------------------------------------------------------|---------------------------|
| <b>Patient 1</b> | Reticulation with some peri-lobular pattern, traction bronchiectasis                                   | F            | 47          | Persistent dyspnea on exertion, fatigue, cough<br>Patient had been admitted with respiratory failure, intubated and ventilated           | 123                       |
| <b>Patient 2</b> | Peripheral consolidation. Ground glass. Vessel enlargement (= "gravity dependent perilobular pattern") | M            | 56          | Persistent fatigue, diffuse muscle pain, memory loss, depression<br>Patient had been admitted for respiratory failure, but not intubated | 128                       |
| <b>Patient 3</b> | Ground glass attenuation, reticulation, peri-lobular pattern                                           | F            | 78          | Persistent dyspnea on exertion, fatigue, low grade fever<br>Patient had been treated at home                                             | 92                        |
| <b>Patient 4</b> | Reticulation with some peri-lobular pattern, traction bronchiectasis                                   | M            | 62          | Persistent dyspnea on exertion, fatigue.<br>Patient had been admitted with respiratory failure and intubated                             | 94                        |
| <b>Patient 5</b> | Ground glass attenuation with peri-lobular pattern, reticulation and traction bronchiectasis           | F            | 52          | Persistent dyspnea on exertion, fatigue, cough, fever<br>Patient had been admitted for respiratory failure, but not intubated            | 124                       |
| <b>Patient 6</b> | Reticulation                                                                                           | M            | 77          | Persistent dyspnea and fatigue<br>Patient had been admitted but not ventilated                                                           | 68                        |
| <b>Patient 7</b> | Minimal changes (mild residual ground glass and gravity dependent perilobular pattern)                 | M            | 37          | Fatigue, muscle pain, depression<br>Patient had been treated at home                                                                     | 56                        |

|                   |                                                                                        |   |    |                                                                                         |     |
|-------------------|----------------------------------------------------------------------------------------|---|----|-----------------------------------------------------------------------------------------|-----|
| <b>Patient 8</b>  | Peripheral consolidation. Ground glass. Perilobular pattern                            | F | 59 | Fatigue, dyspnea, joints pain<br>Patient had been treated at home                       | 115 |
| <b>Patient 9</b>  | Ground glass and gravity dependent perilobular patter                                  | F | 53 | Fatigue. Alopecia. Dyspnea<br>Patient had been treated at home                          | 54  |
| <b>Patient 10</b> | Reticulation with some peri-lobular pattern, traction bronchiectasis                   | M | 52 | Dyspnea. Fatigue<br>Patient had been admitted for respiratory failure but not intubated | 88  |
| <b>Patient 11</b> | Ground glass, halo sign, reticulation                                                  | M | 84 | Fatigue. Dyspnea<br>Patient had been admitted for respiratory failure but not intubated | 99  |
| <b>Patient 12</b> | Minimal changes (mild residual ground glass and gravity dependent perilobular pattern) | F | 49 | Fatigue. Dyspnea. Alopecia<br>Patient had been treated at home                          | 160 |
| <b>Patient 13</b> | Reticulation with some peri-lobular pattern, traction bronchiectasis                   | M | 76 | Dyspnea. Cough<br>Patient had been admitted for respiratory failure but not intubated   | 87  |
